# Supplementary material
Source: PubMed Central journal article supplement (PMC7415482)
Supplement: NIHMS1554713-supplement-Supplemental.pdf [file NIHMS1554713-supplement-Supplemental.pdf]

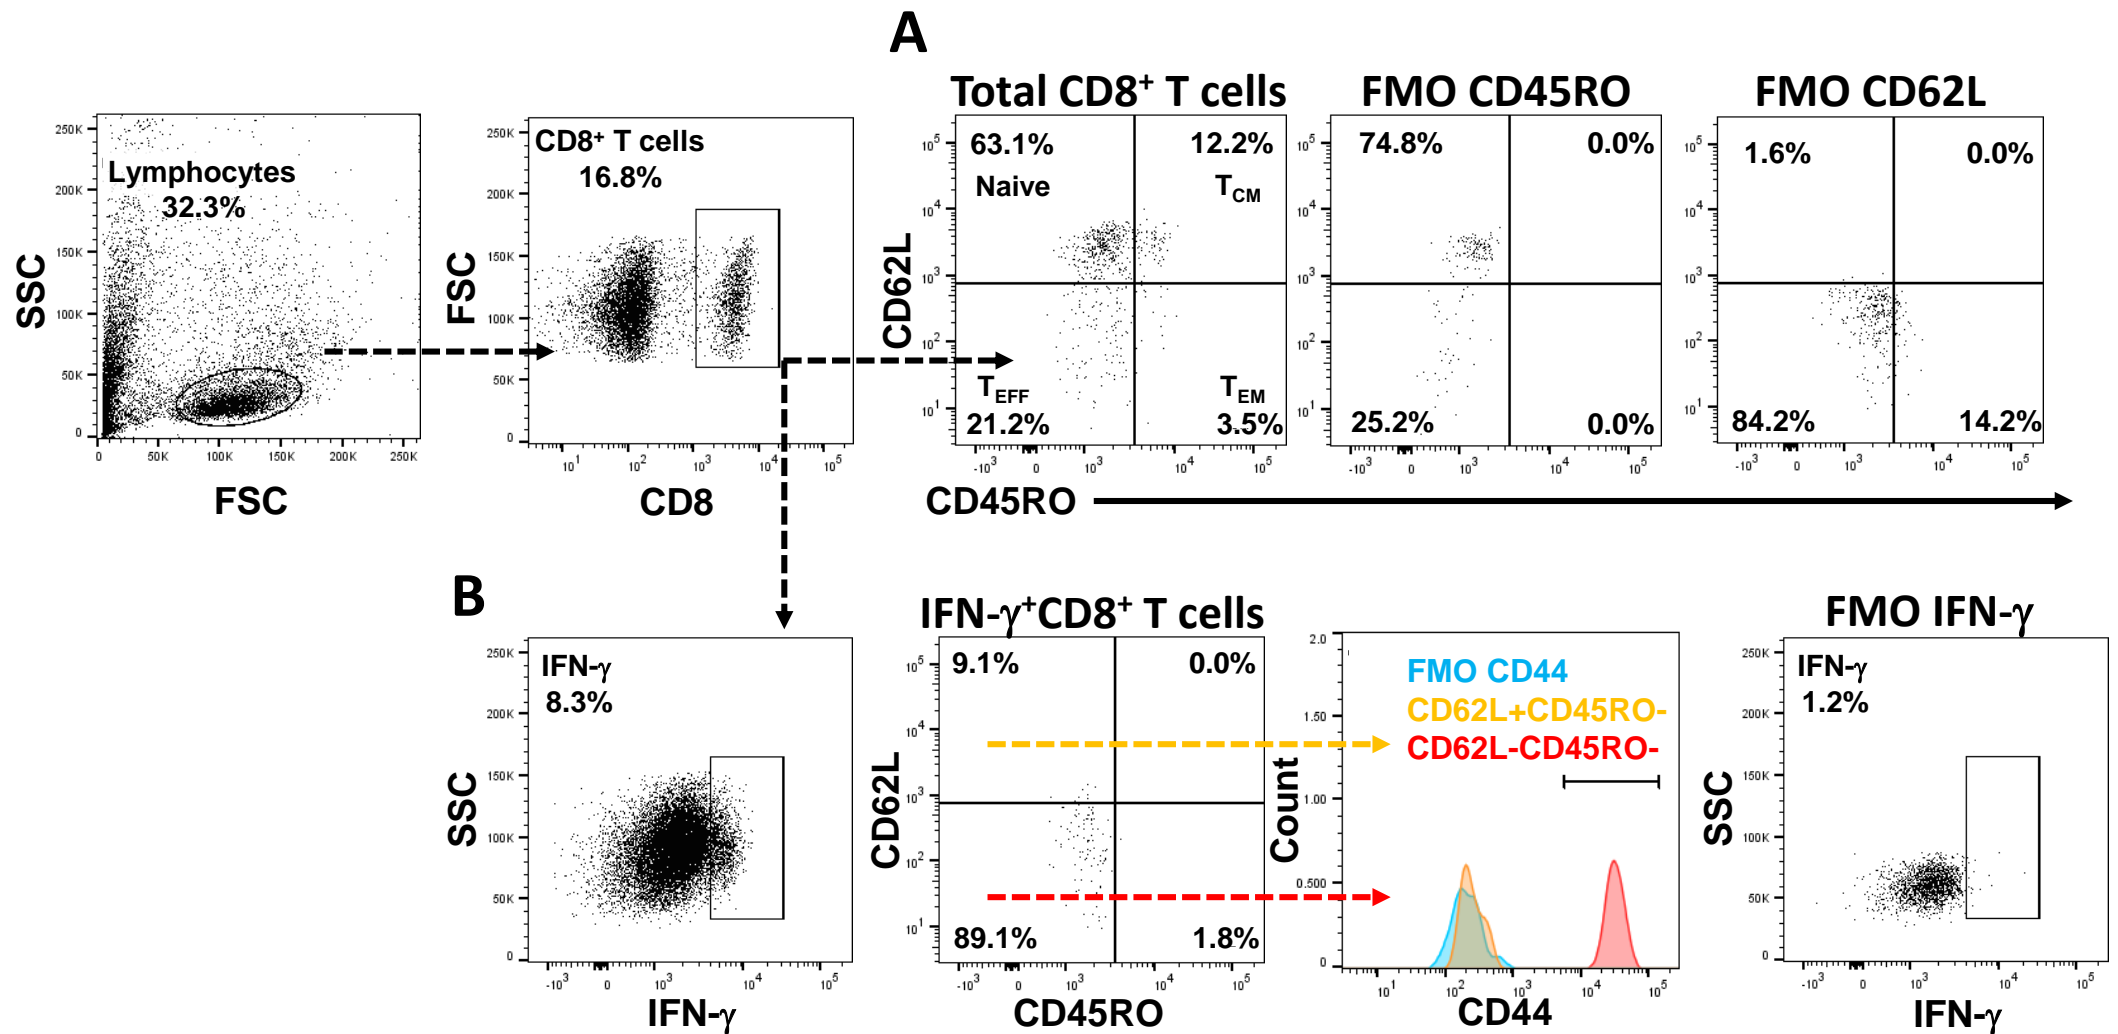

**Figure S1. Peripheral Blood IFN- $\gamma$ <sup>+</sup>CD8<sup>+</sup> T cells Predominantly Express a Terminally Differentiated Effector Phenotype.** Peripheral blood lymphocytes from kidney transplant recipients were analyzed using flow cytometry to determine the composition of naïve (CD62L<sup>+</sup>CD45RO<sup>-</sup>), central memory (T<sub>CM</sub>; CD62L<sup>+</sup>CD45RO<sup>+</sup>), effector memory (T<sub>EM</sub>; CD62L<sup>-</sup>CD45RO<sup>+</sup>), or terminally differentiated effector CD8<sup>+</sup> T cells (T<sub>EFF</sub>; CD62L<sup>-</sup>CD45RO<sup>-</sup>). Cells were initially gated on lymphocytes and CD8<sup>+</sup> T cells. **A**) Representative data (DSA-negative recipient, 3 months posttransplant) shows that circulating CD8<sup>+</sup> T cells consist of 61% naïve CD8<sup>+</sup> T cells, 12% central memory CD8<sup>+</sup> T cells, 3% effector memory CD8<sup>+</sup> T cells, and 21% terminally differentiated effector cells. **B**) When CD8<sup>+</sup> T cells are further gated on IFN- $\gamma$ <sup>+</sup> cells, IFN- $\gamma$ <sup>+</sup>CD8<sup>+</sup> T cells predominantly express a terminally differentiated effector phenotype (CD62L<sup>-</sup>CD45RO<sup>-</sup>). Terminally differentiated effector IFN- $\gamma$ <sup>+</sup>CD8<sup>+</sup> T cells (CD62L<sup>-</sup>CD45RO<sup>-</sup>; red histogram) also express CD44 when compared to naïve cells (orange histogram) and CD44 FMO control (blue histogram). Expression of CD45RO, CD62L, CD44, and IFN- $\gamma$  are shown in comparison to fluorescence minus one (FMO) controls for CD45RO, CD62L, CD44, and IFN- $\gamma$ . Flow antibodies included anti-CD62L (clone DREG-56) and anti-CD45RO (clone UCHL1, both from BD).

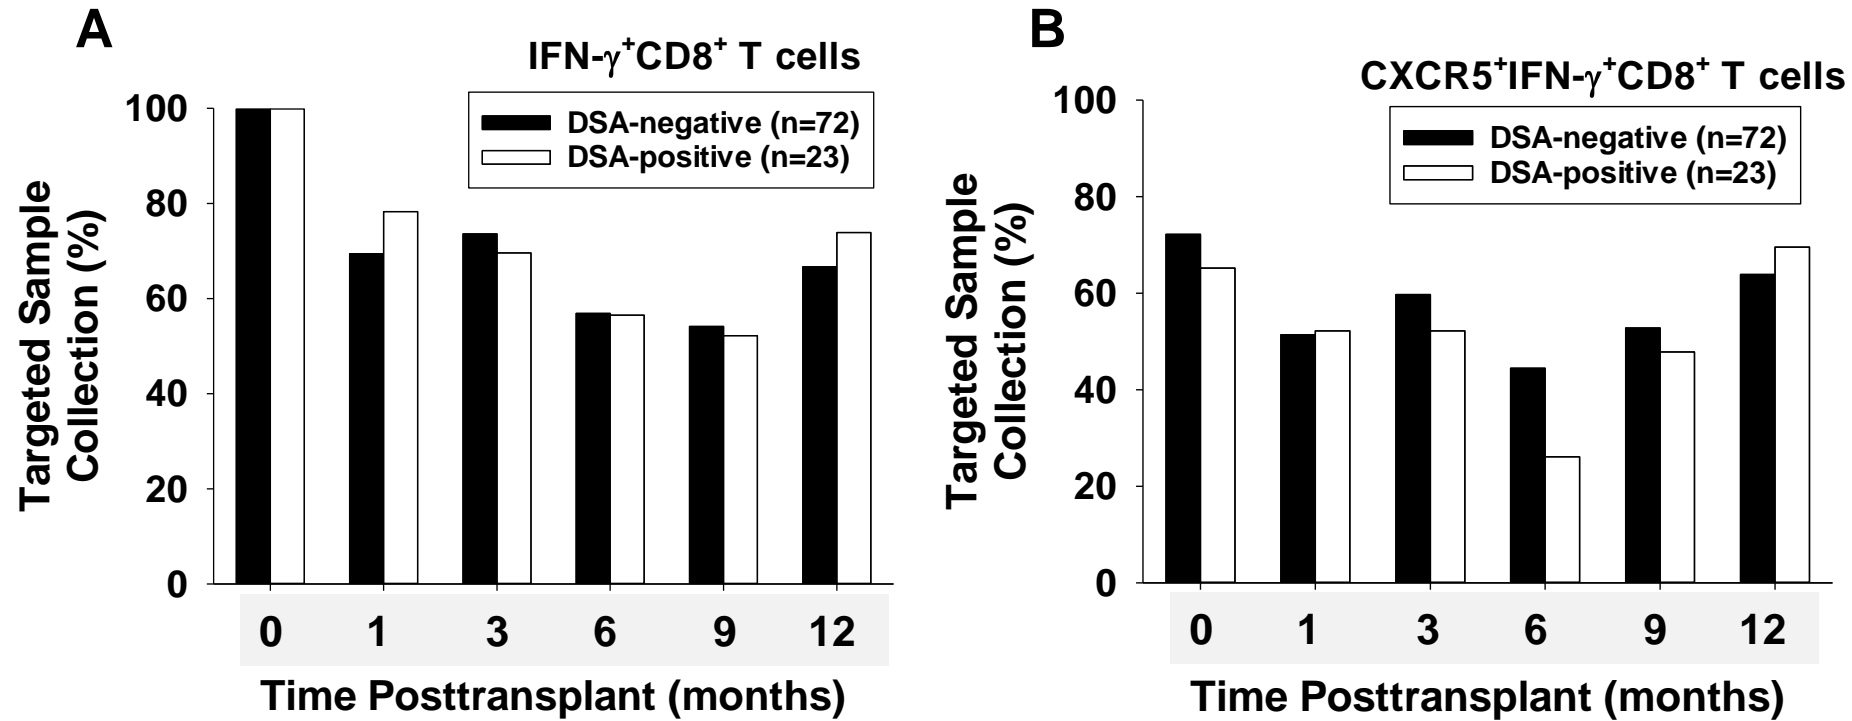

**Figure S2. Capture Rate for Peripheral Blood Samples to Assess Quantity of IFN- $\gamma$ <sup>+</sup>CD8<sup>+</sup> T cells and CXCR5<sup>+</sup>IFN- $\gamma$ <sup>+</sup>CD8<sup>+</sup> T cells in Primary Kidney Transplant Recipients Over the First Year Posttransplant.** Peripheral blood sample collection was targeted for 6 time-points (pretransplant as well as follow-up visits at 1, 3, 6, 9, and 12 months posttransplant) from 95 consenting kidney transplant recipients (570 potential samples). **A)** Samples to analyze peripheral IFN- $\gamma$ <sup>+</sup>CD8<sup>+</sup> T cells were collected with overall 71% (402/570 samples) capture rate of targeted samples including 100% pretransplant, 72% 1 month, 73% 3 month, 57% 6 month, 54% 9 month, and 68% 12 month samples. Sample capture rates were similar for DSA-negative (70%) and DSA-positive (72%) recipients over the 1-year follow up ( $p=0.44$ ). **B)** The peripheral blood sample collection for analysis of CXCR5<sup>+</sup>IFN- $\gamma$ <sup>+</sup>CD8<sup>+</sup> T cells was initiated later in the study and included 56% (320/570) capture rate of the targeted study samples including 72% pretransplant, 52% 1 month, 58% 3 month, 40% 6 month, 52% 9 month, 65% 12 month samples. Sample capture rates were similar for DSA-negative (57%) and DSA-positive (52%) recipients over the 1-year follow up ( $p=0.26$ ).

|                           | <b>HLA Class I antigen specificity</b>  | <b>HLA Class II antigen specificity</b>  |
|---------------------------|-----------------------------------------|------------------------------------------|
| <b>HLA Class I only</b>   | A2, A3, A11, B27, B44, B51, C1, C2, C15 | N/A                                      |
| <b>HLA Class II only</b>  | N/A                                     | DR4, DR7, DR17, DR53, DQ2, DQ5, DQ6, DQ7 |
| <b>HLA Class I and II</b> | A1, A2, A23, B7, B8, B44, B51, B57      | DR7, DR10, DR51, DR53, DQ2, DQ7, DQ8     |

**Figure S3. HLA Class I and HLA Class II Specificity of all DSA at the Time of Initial Detection.** Initial DSA was detected, on average,  $6.0 \pm 3.7$  months posttransplant in 23 of the 95 recipients (24.2%). Of the 23 DSA-positive recipients, recipients developed specificity to HLA I (7 recipients), HLA II (10 recipients), or to both HLA I and HLA II (6 recipients). HLA antigen specificity is listed for all recipients in each group.

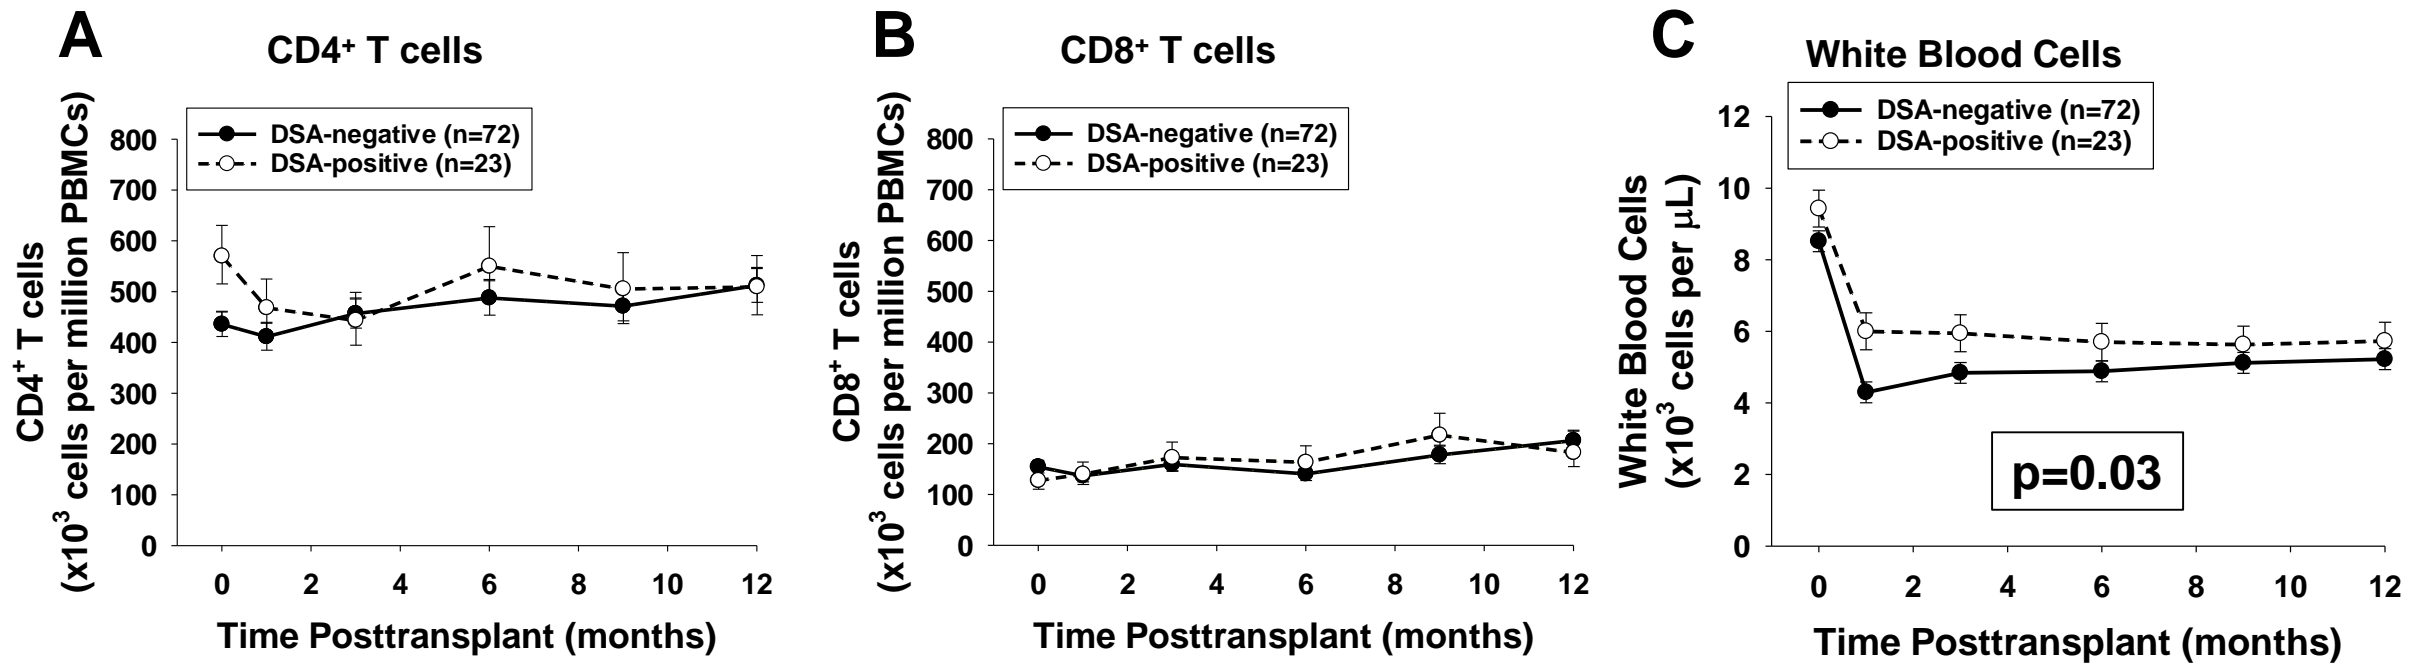

**Figure S4. CD4<sup>+</sup> T cells, CD8<sup>+</sup> T cells, and White Blood cells in Peripheral Blood of DSA-positive and DSA-negative Kidney Transplant Recipients Over the First Year Posttransplant.** Peripheral blood from DSA-positive (n=23) and DSA-negative recipients (n=72) was analyzed for quantity of total CD4<sup>+</sup> T cells and CD8<sup>+</sup> T cells and white blood cell count (WBC) (pretransplant and 1, 3, 6, 9, and 12 months posttransplant). **A)** Total peripheral CD4<sup>+</sup> T cells and **B)** Total peripheral CD8<sup>+</sup> T cells by flow cytometric analysis in DSA-positive and DSA negative recipients were similar ( $p=0.27$  and  $p=0.86$ , respectively). **C)** WBC counts were slightly higher in DSA-positive recipients ( $p=0.03$ ) but were in the normal range ( $4-10 \times 10^3$ ) over the first year posttransplant. Graphed data represents geometric mean  $\pm$  standard error.

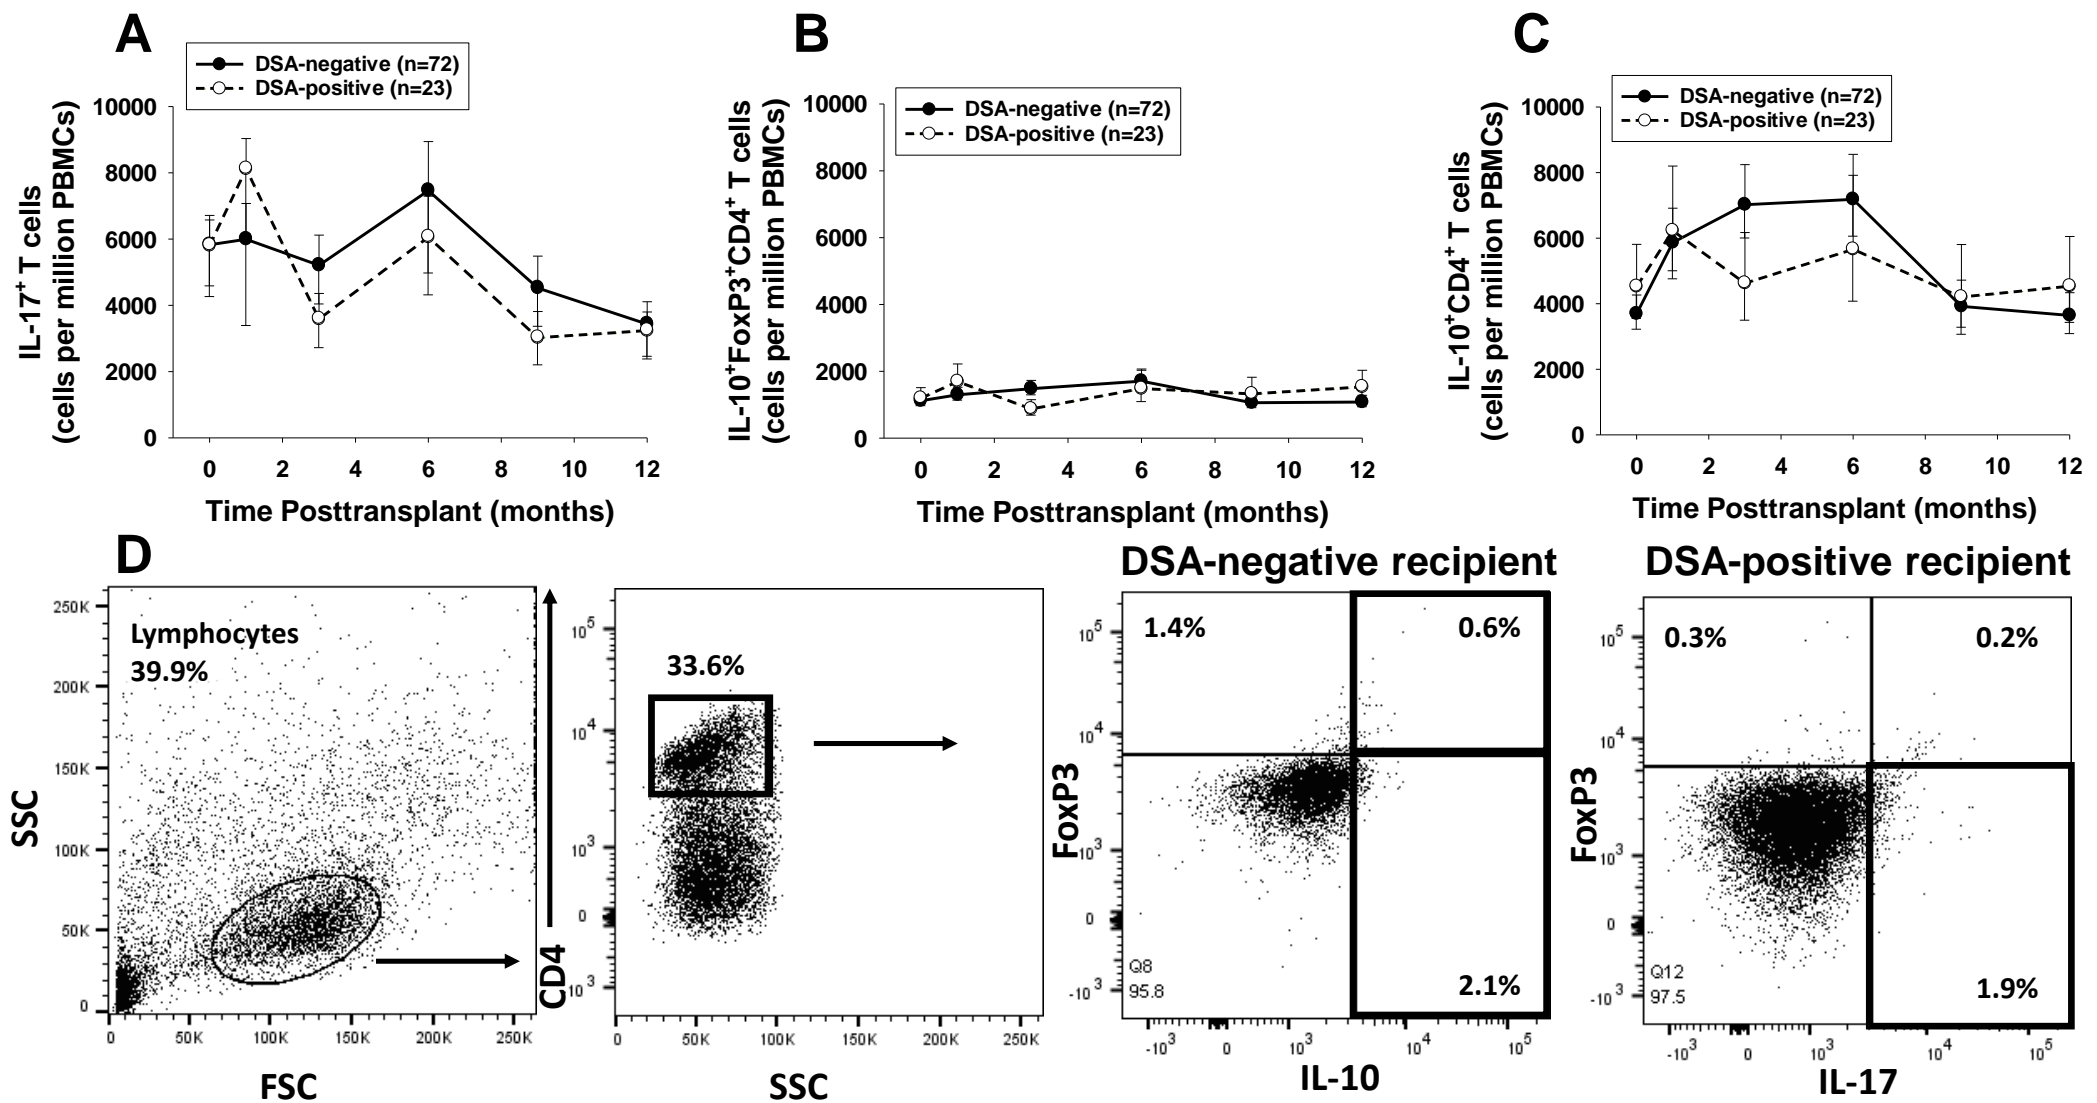

**Figure S5. Quantity of IL-17<sup>+</sup>CD4<sup>+</sup> T cells, FoxP3<sup>+</sup>IL-10<sup>+</sup>CD4<sup>+</sup> T cells, and IL-10<sup>+</sup>CD4<sup>+</sup> T cells in DSA-positive and DSA-negative recipients Over the First Year Posttransplant.** Peripheral blood from DSA-positive recipients (n=23) and DSA-negative recipients (n=72) was analyzed using flow cytometry to determine the quantity of IL-17<sup>+</sup>CD4<sup>+</sup>T cells, FoxP3<sup>+</sup>IL-10<sup>+</sup>CD4<sup>+</sup>T cells, and IL-10<sup>+</sup>CD4<sup>+</sup> T cells. **A-C**) The quantities of IL-17<sup>+</sup>CD4<sup>+</sup>T cells, FoxP3<sup>+</sup>IL-10<sup>+</sup>CD4<sup>+</sup>T cells, and IL-10<sup>+</sup>CD4<sup>+</sup> T cells were not significantly different between DSA-positive and DSA-negative recipients over the first year posttransplant ( $p=0.47$ ,  $p=0.83$ , and  $p=0.94$ , respectively). Graphed data represents geometric mean  $\pm$  standard error. **D**) Flow plots for IL-17, FoxP3, and IL-10 expression on CD4<sup>+</sup> T cells are shown from representative DSA-negative and DSA-positive recipients (3 months posttransplant). Cells were gated on lymphocytes and CD4<sup>+</sup> T cells. Flow antibodies included anti-IL-17 (clone N49-653), anti-FoxP3 (clone 259D/C7), and anti-IL-10 (clone JES3-9D7, all from BD).

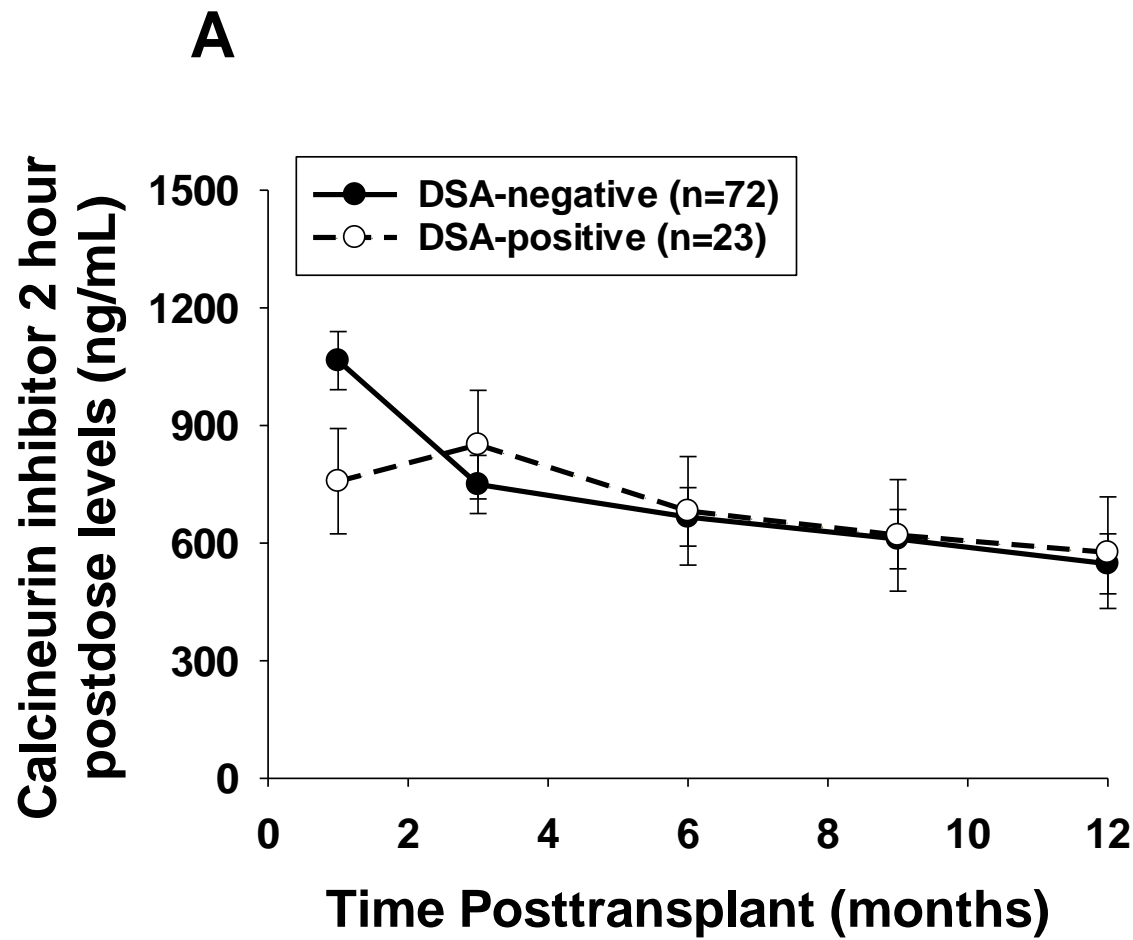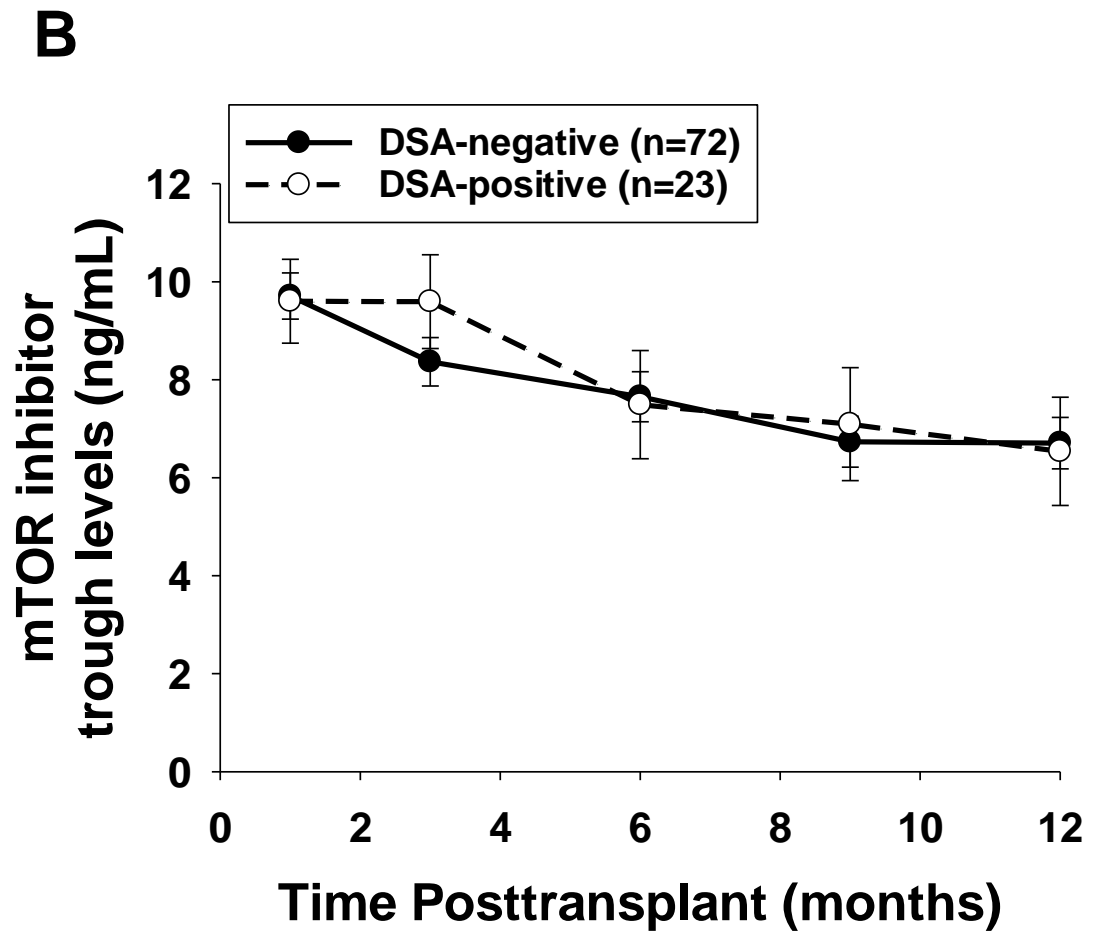

**Figure S6. CNI and mTORi Immunosuppression Levels in DSA-positive and DSA-negative Recipients Over the First Year Posttransplant.** Following kidney transplantation, recipients were maintained on an immunosuppressive regimen consisting of a combination of calcineurin inhibition (CNI, with Neoral) and mTOR inhibition (mTORi, with Rapamune or Zortress). Immunosuppression CNI 2 hour peak (C2) and mTORi trough levels were analyzed in 95 recipients at 1, 3, 6, 9, and 12 months posttransplant. **A)** DSA-negative (n=72) and DSA-positive recipients (n=23) had similar CNI C2 hour levels over the first year posttransplant (p=0.68). **B)** DSA-positive and DSA-negative recipients had similar mTORi trough levels over the first year posttransplant (p=0.69). Graphed data represents geometric mean  $\pm$  standard error.

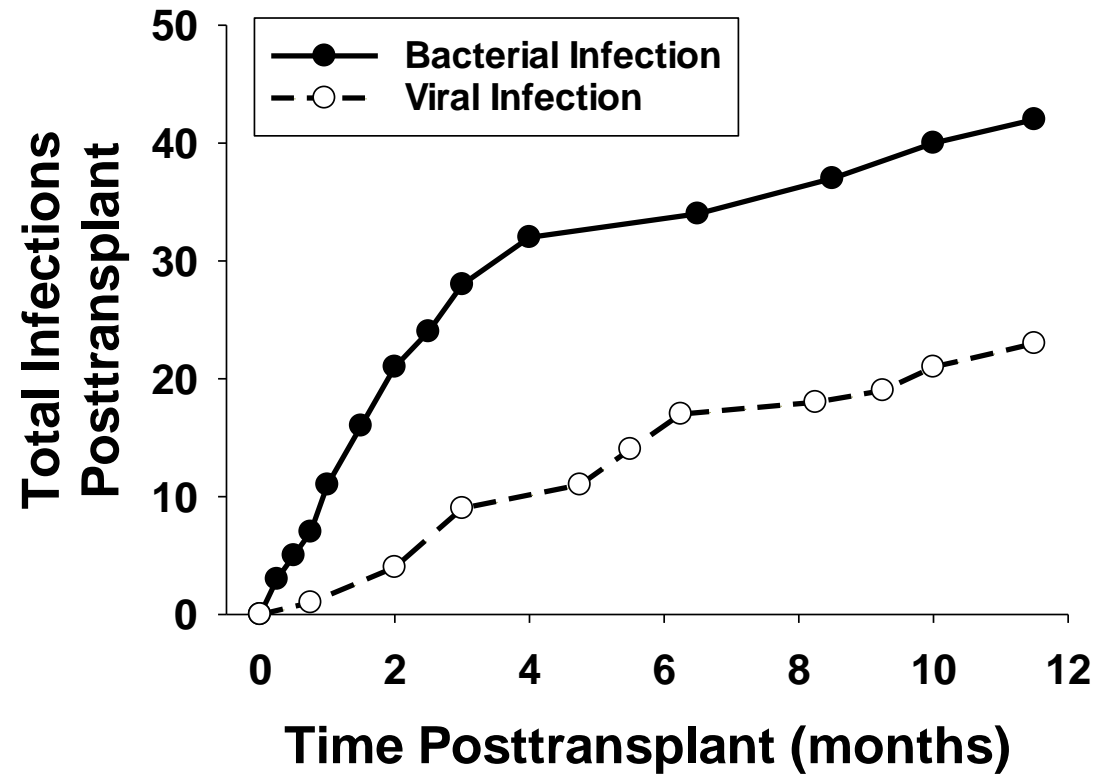

**Figure S7. Cumulative Bacterial and Viral infections in 95 First-time Kidney Transplant Recipients Over the First Year Posttransplant.** Following kidney transplantation (n=95), 43 recipients (45.3%) developed a bacterial (25 recipients) and/or viral (22 recipients) infection over the first year posttransplant. Most recipients with infection only developed 1 bacterial infection (17/25) and/or 1 viral infection (21/22) during the study period. Six recipients developed multiple bacterial infections, 4 recipients developed bacterial and viral infections (2 of whom also had multiple bacterial infections), and 1 recipient developed multiple viral infections. The majority of bacterial infections occurred in the first 4 months posttransplant (32 of 42 total infections; 8 patients with multiple bacterial infections). Viral infections (23 total) were less common than bacterial infections and their occurrence was more evenly distributed over the 1 year follow-up (1 recipient with 2 viral infections).
